# Supplementary material for: Wnt/β-catenin activation epigenetically reprograms Regulatory T cells in IBD and progression to dysplasia.
Source: Research Square preprint supplement (doi:10.21203/rs.3.rs-110212/v1), 2020-12-01
Supplement: Supplementary file 1 [file 8407edc80972043599564210.xlsx]

## Sheet: Sheet1
TH17_UP signature			Treg_UP signature			Combined Th17_UP/Treg_UP signature
Gene	Beta Value		Gene	Beta Value		Gene	Beta Value
ACTN2	0.0312258		ENO3	0.00196102		ENO3	0.00195739
VAX2	0.0274184		HIST2H2BE	0.00152011		HIST2H2BE	0.00151715
TIMP1	0.0272356		SH3GL3	0.00120355		TIMP1	0.00141572
SPRN	0.0248715		ZCCHC18	0.0010835		ACTN2	0.0012825
ERMN	0.0245201		INPP5F	0.00101507		VAX2	0.00121844
STAP1	0.0190563		MDFIC	0.000979938		SH3GL3	0.00119859
IL21	0.0181483		GGT5	0.000972176		ERMN	0.00116097
MARCKSL1	0.0169259		KLRG1	0.000971092		ZCCHC18	0.00106749
DNAJC12	0.0167759		LEF1	0.000951936		SPRN	0.00100603
MSC	0.0147241		NRP1	0.000943265		INPP5F	0.000997456
TGM2	0.0145256		ARL4C	0.000919206		MDFIC	0.000960483
ENPP2	0.0126948		TIAM1	0.000912066		KLRG1	0.00095248
PDGFB	0.0125824		MAPK12	0.000908769		LEF1	0.000942954
CLIP3	0.0118914		FRMD6	0.000897413		GGT5	0.000940889
TFE3	0.0109911		MAF	0.000852467		NRP1	0.00090825
SLC2A6	0.0107366		SLC20A1	0.000838938		ARL4C	0.0008956
DUSP2	0.0107036		RHOQ	0.000828175		TIAM1	0.000895504
RORA	0.0103065		AMIGO2	0.000802789		MAPK12	0.000894443
TRPS1	0.0102353		ITK	0.000799464		FRMD6	0.000876363
SLC15A1	0.00994979		CYTH3	0.000797585		MSC	0.000847343
SLC15A3	0.00974969		TNFRSF18	0.000781669		SLC20A1	0.000824127
BEND5	0.0089329		TGFBR1	0.000771891		MAF	0.000821068
TSPAN3	0.0084928		PRNP	0.000763948		STAP1	0.000804722
SERPINE1	0.00808557		ENO2	0.000749227		CLIP3	0.000801327
CITED4	0.0078333		ADAMTS6	0.000727846		RHOQ	0.000796682
IGF1R	0.00638558		IL1RL1	0.000727496		AMIGO2	0.000793865
LUM	0.00636282		GIMAP7	0.000722711		CYTH3	0.000784426
GSTT1	0.00620372		CNGA1	0.000701356		ITK	0.000783435
STX11	0.00616488		EVI2A	0.000662857		PDGFB	0.000775848
CA13	0.00607984		ICAM1	0.000661609		IL21	0.000772804
SOX5	0.00602675		GPR174	0.000655712		TNFRSF18	0.000764403
PCSK1	0.00549407		ENTPD1	0.000644232		TGM2	0.000751615
SDC4	0.00520468		IKZF2	0.000643868		TGFBR1	0.000746923
CD74	0.00513864		GSN	0.000637747		PRNP	0.000741519
EMB	0.00498968		FAM129A	0.000637377		ENO2	0.000736519
CCR6	0.00498206		ADH1A	0.000631525		DNAJC12	0.000732077
ENPP4	0.00477272		ECM1	0.000628189		IL1RL1	0.000717875
SOCS3	0.00469532		NFIL3	0.000623648		CNGA1	0.000703803
CACNB2	0.00404951		LTA	0.000620853		ADAMTS6	0.000700818
P2RX7	0.00389265		TMEM136	0.000619377		SLC15A3	0.000694953
ADM	0.00334016		RABGAP1L	0.000614908		GIMAP7	0.000692785
AVPI1	0.00299924		RGS16	0.000608806		SLC2A6	0.000682932
CRISPLD2	0.00281384		POU2AF1	0.000591474		RORA	0.000682278
IFT81	0.00261082		LAIR1	0.000590979		TFE3	0.000665031
TMIGD1	0.0023933		PEAR1	0.000571967		BEND5	0.000660093
MTMR7	0.00226082		OSBPL3	0.000563276		TRPS1	0.000658364
UPP1	0.00203301		GEM	0.000560879		GPR174	0.000643064
CTLA4	0.0018853		DST	0.000551408		EVI2A	0.000634079
PPIC	0.0012955		STX11	0.000550844		ICAM1	0.000633702
PRR29	0.00111834		P4HA1	0.000531199		IKZF2	0.000631538
NRROS	0.00108851		TGFBR2	0.000523524		GSN	0.000623218
BCL2L11	0.000685441		EEF2K	0.000523137		ADH1A	0.000622404
DGAT1	0.000475307		CAPG	0.000519226		ECM1	0.000610759
FARSB	0.000411134		GVINP1	0.000516974		ENTPD1	0.000609793
APP	0.000165809		CD83	0.000511886		ENPP2	0.000608788
ATP6V0D2	0.000138863		EPHX1	0.000503496		MARCKSL1	0.000607111
RORC	-0.00068826		IZUMO1R	0.000502132		FAM129A	0.000605587
CYSLTR2	-0.000704813		PDLIM4	0.000500892		RABGAP1L	0.000604884
AKAP12	-0.000735511		SEMA4F	0.000495483		NFIL3	0.000603793
CLDND1	-0.000967361		TGFBR3	0.000494983		LTA	0.000603303
MCAM	-0.00112314		SWAP70	0.000491289		TMEM136	0.000599541
IL1R1	-0.0012259		CCL5	0.000488076		RGS16	0.000589349
ACPP	-0.00169583		GMFG	0.000482817		POU2AF1	0.000585079
KRT18	-0.00186219		DENND5A	0.000481787		OSBPL3	0.000561557
SYTL2	-0.00219612		CD86	0.000478819		LAIR1	0.000560244
PLEKHF1	-0.00250939		GADD45G	0.000472396		PEAR1	0.000544067
NEBL	-0.00280311		RGS1	0.000471397		GEM	0.000542083
SESN3	-0.00287788		SPRY1	0.000447503		DST	0.000532392
IL17A	-0.00372432		TNFRSF4	0.000431076		P4HA1	0.000524216
ATRNL1	-0.00543336		TNFRSF25	0.000429884		CRISPLD2	0.000523452
CA4	-0.00569524		TSPYL4	0.000423981		STX11	0.00052159
CACNA1S	-0.00634578		DNTT	0.000422124		EEF2K	0.000513556
IL1B	-0.00647164		P2RY10	0.000421997		TGFBR2	0.000511612
ABHD15	-0.00755812		GPRASP2	0.000419538		CAPG	0.000511557
CAPN3	-0.00810894		SLC22A2	0.000414842		GVINP1	0.000501275
PDPN	-0.00849288		EGR2	0.000393383		EPHX1	0.000499821
ZC3H12D	-0.0090836		CD81	0.000373382		IZUMO1R	0.000497649
HMGN3	-0.00946053		RANBP10	0.000354761		CD83	0.000491912
CLEC4E	-0.0100392		LYSMD2	0.000351922		SEMA4F	0.000490661
IL22	-0.0106622		PHTF2	0.000347309		LUM	0.000484907
AQP3	-0.011678		NT5E	0.00034298		TGFBR3	0.000483865
ANXA3	-0.0121431		TLR7	0.000319186		PDLIM4	0.000474308
MYO6	-0.0128612		SHE	0.000318412		GADD45G	0.000470467
EGR1	-0.0131004		IFT80	0.000314955		SWAP70	0.000468737
GZMB	-0.0132518		GPR171	0.00029993		CCL5	0.000467277
CPM	-0.0140579		PIK3R5	0.000297622		SOCS3	0.000458482
PPP1R14C	-0.0150281		CA12	0.000297172		GMFG	0.000456105
CPD	-0.0183773		PIM2	0.00029603		DENND5A	0.000449109
IL1R2	-0.0185375		GSTO1	0.000296019		CD86	0.000448347
			BHLHE40	0.000290883		RGS1	0.000448191
			PDCD1LG2	0.000284665		SERPINE1	0.000433824
			ALS2CL	0.000281263		TNFRSF25	0.000432619
			NRN1	0.000263016		CD74	0.00042786
			RTN4RL1	0.000246191		SPRY1	0.000425443
			GBP1	0.000244631		DNTT	0.000422351
			EMB	0.000242489		TSPYL4	0.00041479
			CST7	0.000237438		P2RY10	0.000407812
			EEF1AKMT1	0.000235982		CITED4	0.000407251
			GPR183	0.000232596		SLC22A2	0.00040675
			CAMK2N1	0.000224534		TNFRSF4	0.000402829
			SDC4	0.00022447		GPRASP2	0.000400746
			LRIG1	0.000223942		P2RX7	0.000399679
			PPIC	0.00021711		SOX5	0.000395494
			CTLA4	0.000207727		SLC15A1	0.000389876
			SMYD2	0.000207028		DUSP2	0.000386278
			FASLG	0.000204501		EGR2	0.000376467
			LPXN	0.000204129		IGF1R	0.000374791
			TRIM59	0.000202722		CD81	0.000360521
			MAP3K8	0.000199131		RANBP10	0.000354752
			SLC9B2	0.000190823		LYSMD2	0.000343594
			CCR6	0.000190193		NT5E	0.000340492
			PRG4	0.0001868		IL1R1	0.000335665
			IL2RA	0.000181745		PHTF2	0.000329142
			PRKCA	0.000176083		IFT80	0.000317013
			ADAM19	0.000170652		TSPAN3	0.000310886
			PHLDA1	0.000168954		NRROS	0.000309041
			KLRD1	0.000164442		PRR29	0.000307879
			SGK1	0.000160548		CA12	0.000301286
			SNX18	0.000156543		TLR7	0.000296681
			EBI3	0.000156095		GSTO1	0.000294125
			IRF4	0.000149933		MCAM	0.0002933
			TNFRSF9	0.000136547		GSTT1	0.000288994
			PLP2	0.000132691		ALS2CL	0.000287439
			BCL2L1	0.000120643		PIM2	0.000286839
			PROS1	0.000117772		GPR171	0.000281428
			RCN1	0.000111141		SHE	0.000281335
			SH3BGRL	0.000105173		BHLHE40	0.000280154
			PXYLP1	7.43149e-05		CACNB2	0.000265342
			BCL9	6.61798e-05		NRN1	0.00026209
			CPE	5.8969e-05		PIK3R5	0.000259387
			ITGAE	5.27552e-05		PDCD1LG2	0.00025464
			SAMSN1	4.46404e-05		UPP1	0.000248865
			MCUB	3.90453e-05		RTN4RL1	0.000248158
			SPIN2A	3.82369e-05		EMB	0.000239788
			PDK1	3.74934e-05		EEF1AKMT1	0.000237663
			SLAMF1	2.89479e-05		CST7	0.000234468
			GNAQ	2.83997e-05		CAMK2N1	0.000230694
			GPR34	2.17188e-05		SDC4	0.000224295
			PTPN13	1.28246e-05		GBP1	0.000223872
			GABARAPL1	1.8032e-06		BCL2L11	0.00021638
			APLP2	-7.22227e-06		SMYD2	0.000216266
			RAPGEF4	-7.72455e-06		CA13	0.00021333
			CHD7	-9.12868e-06		LRIG1	0.000212428
			PMAIP1	-1.46836e-05		ADM	0.00020902
			CRAMP1	-1.61258e-05		TRIM59	0.000206962
			GGT1	-2.08632e-05		GPR183	0.000206874
			TMEM158	-3.63304e-05		PPIC	0.000201011
			PPM1L	-4.91901e-05		PCSK1	0.000197894
			CD38	-5.16611e-05		CTLA4	0.000195748
			PRR13	-5.388e-05		LPXN	0.000192322
			TMEM64	-5.51616e-05		AKAP12	0.000191544
			CERK	-5.66356e-05		CCR6	0.000190737
			LXN	-5.74648e-05		FASLG	0.000190592
			CD200	-6.21472e-05		PRG4	0.000184366
			GRHL1	-7.54499e-05		MAP3K8	0.000179436
			TASP1	-8.49271e-05		SLC9B2	0.0001772
			DDC	-9.52259e-05		PRKCA	0.000175381
			WLS	-9.68544e-05		PHLDA1	0.000166306
			SCML4	-0.000100843		IL2RA	0.000157053
			GRAMD2B	-0.00010739		ADAM19	0.000153891
			MBNL3	-0.000111593		MTMR7	0.000146868
			GRAMD1A	-0.000113841		SGK1	0.000143347
			TMTC4	-0.000118927		CYSLTR2	0.00014226
			KLHDC2	-0.000121228		KLRD1	0.000141577
			PLSCR1	-0.000132041		IRF4	0.000140825
			PTGER4	-0.000134165		PLP2	0.000140007
			ATP5IF1	-0.000142746		EBI3	0.000139528
			ACPP	-0.000144945		IFT81	0.000136858
			ARRDC4	-0.000157019		SNX18	0.000127741
			ATP6V0A1	-0.000166061		BCL2L1	0.000118826
			GFI1	-0.00016739		ENPP4	0.000114939
			PDE3B	-0.000168442		TNFRSF9	0.000114817
			YBX3	-0.000172829		ATP6V0D2	0.000114034
			TMEM71	-0.000174469		RCN1	0.000110989
			SAMHD1	-0.000177729		PROS1	0.000106247
			PHLPP1	-0.000178807		AVPI1	0.000104225
			TNFSF11	-0.0001846		SH3BGRL	8.9326e-05
			KCNK6	-0.000188781		PXYLP1	7.92598e-05
			XPO1	-0.000198262		BCL9	6.80358e-05
			NLK	-0.000206369		TMIGD1	6.0486e-05
			VIPR1	-0.000207347		CPE	5.50523e-05
			UNC119	-0.000207409		ITGAE	4.2424e-05
			FOXP3	-0.000211741		PDK1	4.20963e-05
			MBOAT1	-0.000219202		SPIN2A	3.38126e-05
			PAFAH1B3	-0.000239023		MCUB	2.94842e-05
			POLE2	-0.000272653		GNAQ	2.444e-05
			EEA1	-0.000273154		APP	1.75313e-05
			CYFIP1	-0.00028318		SAMSN1	1.29477e-05
			MCTP2	-0.000287223		SLAMF1	1.09035e-05
			GBP3	-0.000295311		PTPN13	1.05144e-05
			ADD3	-0.000315442		GPR34	-3.03177e-06
			MYO1E	-0.00032394		DGAT1	-5.19973e-06
			TTC30B	-0.000329639		CHD7	-5.47845e-06
			APPL2	-0.000339872		GABARAPL1	-9.8511e-06
			ZC3H12D	-0.000377316		RAPGEF4	-1.24428e-05
			HMGN3	-0.000391279		GGT1	-1.49846e-05
			CYP2S1	-0.000400628		APLP2	-1.52365e-05
			CAPN3	-0.000402104		CRAMP1	-1.72781e-05
			IGF2R	-0.000423784		PMAIP1	-2.12983e-05
			PTGER2	-0.000430893		PLEKHF1	-2.90898e-05
			ENTPD5	-0.000433746		PDPN	-3.06139e-05
			LARP1B	-0.000463764		PRR13	-4.52691e-05
			HNRNPLL	-0.000465913		KRT18	-4.54286e-05
			XKRX	-0.000473822		TMEM158	-4.67634e-05
			CASP7	-0.000500867		ATRNL1	-5.01765e-05
			GATA1	-0.000506529		CLDND1	-5.50883e-05
			HOMER1	-0.000519813		PPM1L	-5.68889e-05
			SH3BGRL2	-0.000529259		RORC	-5.81742e-05
			ZDHHC2	-0.000563676		TMEM64	-5.86941e-05
			GZMB	-0.000574369		CD38	-6.29648e-05
			MELK	-0.000591576		CERK	-6.36859e-05
			PDPK1	-0.000597181		LXN	-6.96257e-05
			SGMS1	-0.000601627		CLEC4E	-7.24033e-05
			ERGIC1	-0.00061253		CD200	-7.41992e-05
			CISH	-0.000616169		GRHL1	-7.98145e-05
			METTL9	-0.0006549		SESN3	-8.10603e-05
			ACOT7	-0.000680111		TASP1	-8.34368e-05
			FABP5	-0.000680215		DDC	-8.51585e-05
			SLC22A5	-0.000691857		SCML4	-0.000101573
			SEC24A	-0.00070177		WLS	-0.000102728
			MED7	-0.000716874		GRAMD2B	-0.000108045
			XDH	-0.000750213		GRAMD1A	-0.000112063
			NAF1	-0.00076804		MBNL3	-0.000112826
			GPI	-0.000772247		KLHDC2	-0.000115483
			IBTK	-0.000806525		TMTC4	-0.000117441
			WDR78	-0.000846157		PTGER4	-0.000128999
			SLC35D1	-0.000888703		ATP5IF1	-0.000129012
			CCRL2	-0.000911443		PLSCR1	-0.000131266
			NCOA7	-0.000978121		ACPP	-0.000140241
			F2RL1	-0.00100516		FARSB	-0.000152427
						IL1B	-0.000156208
						ARRDC4	-0.000166249
						ATP6V0A1	-0.000166963
						PDE3B	-0.000167391
						SYTL2	-0.000173143
						GFI1	-0.000173596
						YBX3	-0.000174277
						TMEM71	-0.000175813
						PHLPP1	-0.000178544
						TNFSF11	-0.000188702
						XPO1	-0.000191523
						VIPR1	-0.000194566
						KCNK6	-0.00019736
						NLK	-0.000199271
						UNC119	-0.000201483
						SAMHD1	-0.000203112
						MBOAT1	-0.000213565
						NEBL	-0.000224132
						PAFAH1B3	-0.000230225
						FOXP3	-0.000235312
						POLE2	-0.000260099
						IL17A	-0.000260978
						CACNA1S	-0.000269589
						EEA1	-0.000271951
						MCTP2	-0.000282973
						CYFIP1	-0.000288104
						CA4	-0.000291052
						GBP3	-0.000292681
						ADD3	-0.000301278
						ABHD15	-0.000320611
						TTC30B	-0.000322483
						MYO1E	-0.000332564
						APPL2	-0.000334031
						AQP3	-0.000343976
						ZC3H12D	-0.000377361
						HMGN3	-0.000390549
						CYP2S1	-0.000394565
						CAPN3	-0.000397166
						ENTPD5	-0.000423533
						IGF2R	-0.000429165
						PTGER2	-0.000434632
						CPM	-0.000453925
						EGR1	-0.000454562
						LARP1B	-0.000456879
						HNRNPLL	-0.000462322
						XKRX	-0.000466396
						CASP7	-0.000494095
						SH3BGRL2	-0.000512241
						GATA1	-0.000517231
						HOMER1	-0.000518331
						IL22	-0.000533323
						ZDHHC2	-0.000563376
						GZMB	-0.00057496
						MELK	-0.000580966
						PDPK1	-0.000595689
						MYO6	-0.000601687
						SGMS1	-0.000607074
						ERGIC1	-0.000608138
						ANXA3	-0.000609005
						CISH	-0.000609132
						METTL9	-0.000650022
						FABP5	-0.000673587
						ACOT7	-0.000674197
						SLC22A5	-0.000680488
						MED7	-0.000705608
						SEC24A	-0.000710714
						CPD	-0.000739989
						XDH	-0.000745441
						PPP1R14C	-0.000748724
						IL1R2	-0.000748949
						NAF1	-0.000761864
						GPI	-0.000764778
						IBTK	-0.000805347
						WDR78	-0.000837725
						SLC35D1	-0.000877086
						CCRL2	-0.000901412
						NCOA7	-0.000979332
						F2RL1	-0.000990769
